# Supplementary material for: Micro-environmental sensing by bone marrow stroma identifies IL-6 and TGFβ1 as regulators of hematopoietic ageing
Source: PubMed Central journal article supplement (PMC7427787; doi:10.1038/s41467-020-17942-7), 2020-08-14
Supplement: 41467_2020_17942_MOESM1_ESM.pdf [file 41467_2020_17942_MOESM1_ESM.pdf]

**Micro-environmental sensing by bone marrow stroma identifies IL-6 and TGF $\beta$ 1 as regulators of hematopoietic ageing.**

Valletta et al.

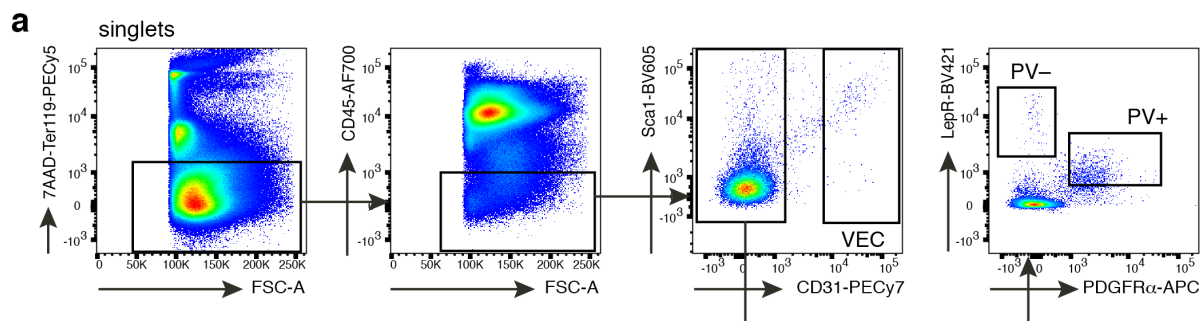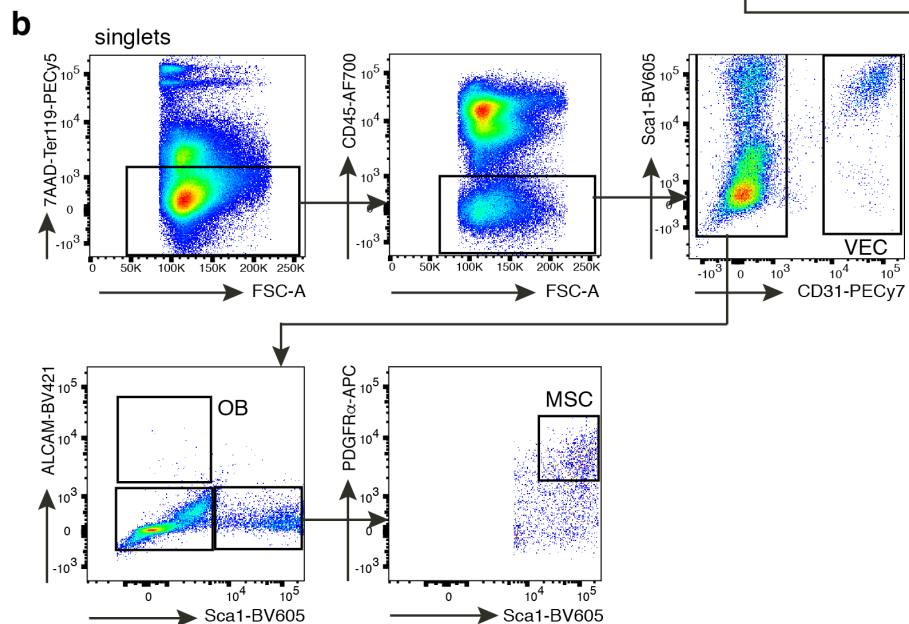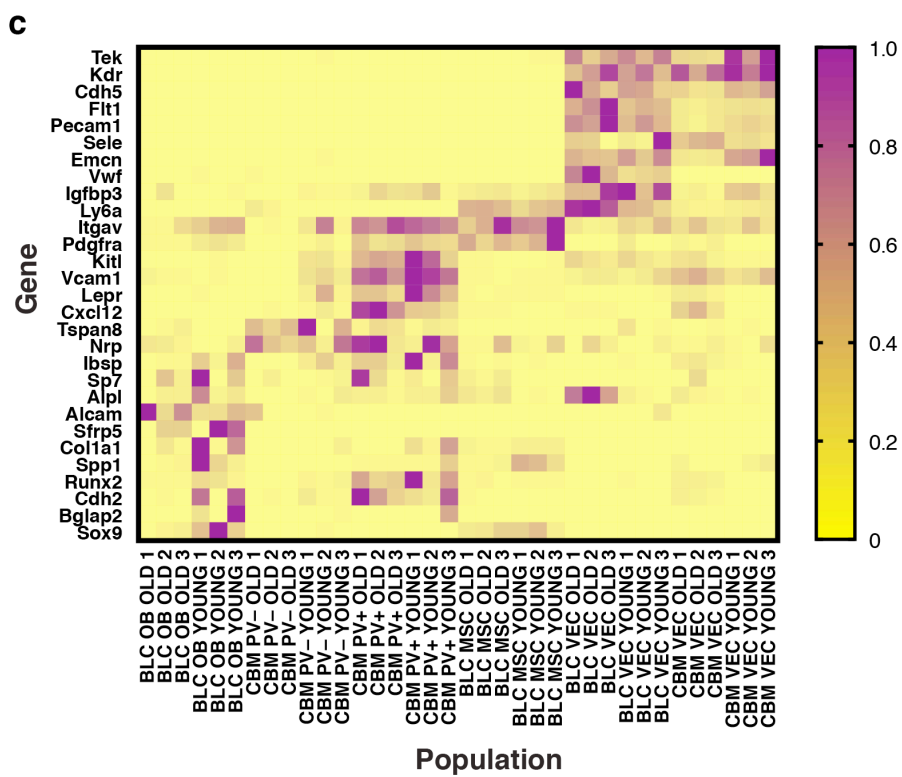

Supplementary Figure 1

**Supplementary Figure 1. Isolation and characterization of stromal cell types.**

- a)** Gating strategy for the isolation of central bone marrow (CBM) stromal cells. VEC: vascular endothelial cells; PV<sup>-</sup>: LepR+PDGFR $\alpha$ <sup>-</sup> perivascular cells. PV<sup>+</sup>: LepR+PDGFR $\alpha$ <sup>+</sup> perivascular cells.
- b)** Gating strategy for the isolation of bone lining (BL) stromal cells. VEC: vascular endothelial cells; OB: osteoblasts; MSC: mesenchymal stromal cells.
- c)** Heatmap of the expression of the indicated marker genes in young and old sorted bone marrow stromal cell populations. Data were normalized and scaled for each gene individually.

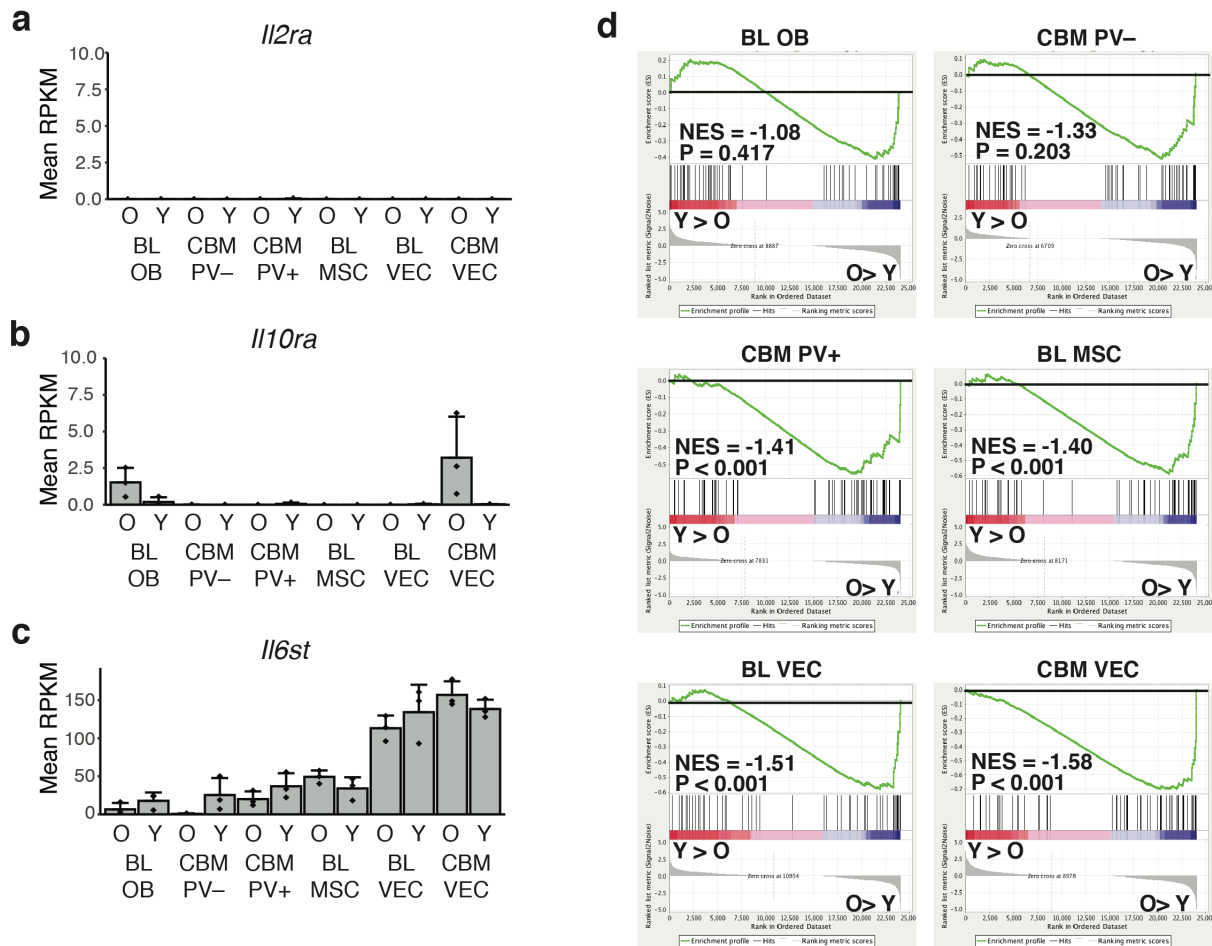

**Supplementary Figure 2**

**Supplementary Figure 2. IL-6 signaling in aged stromal cells.**

**a-c)** Expression of genes encoding the indicated cytokine receptor subunits in young and old stromal cell populations measured by RNA sequencing. The values represent the mean  $\pm$  s.d. of 3 biological replicates/population.

**d)** GSEA analysis comparing the expression of IL-6 induced genes (MSigDb gene set M14344) between young and old bone marrow stromal cells for the indicated cell populations. The normalized enrichment score (NES) and P-value are shown.

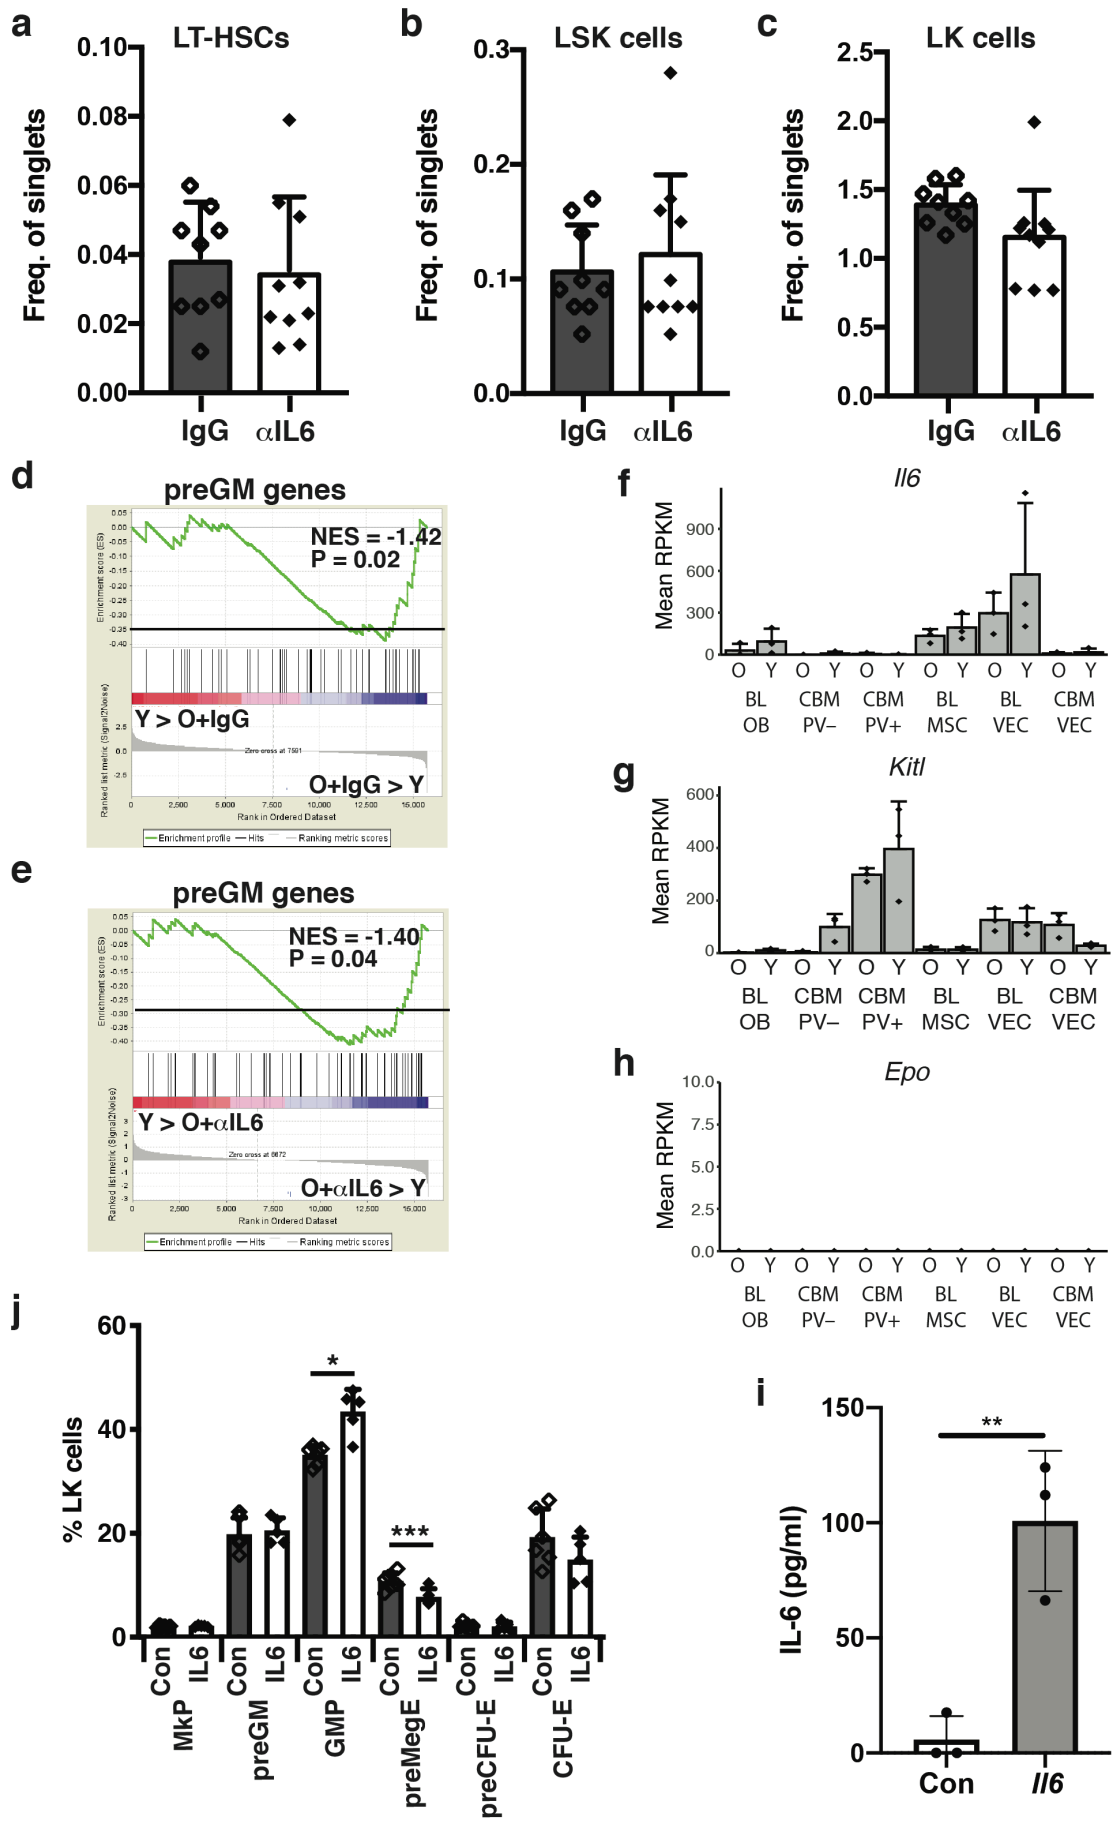

Supplementary Figure 3

### Supplementary Figure 3. Effect of IL-6 on HSCs and myeloid progenitors.

**a-c)** Bar graph showing the number of LT-HSCs (a), LSK (b) and LK (c) cells isolated from BM of old mice after injection of control IgG (N=9) or anti-IL-6 antibody (N=10) as frequency of live single cells. Data are from 5 independent experiments and are shown as mean  $\pm$  s.d. Differences between conditions were not significant (two-tailed, unpaired Student's t-test).

**d)** GSEA analysis comparing expression of preGM-specific genes in preCFU-E cells isolated from BM of young mice and old mice after injection of control IgG. The normalized enrichment score (NES) and P-value are shown.

**e)** GSEA analysis comparing expression of preGM-specific genes in preCFU-E cells isolated from BM of young mice and old mice after injection of anti-IL-6 antibody. The normalized enrichment score (NES) and P-value are shown.

**f)** Expression of the gene encoding IL-6 in young and old stromal cell populations measured by RNA sequencing. The values represent the mean  $\pm$  s.d. of 3 biological replicates/population.

**g)** Expression of the gene encoding KitL/SCF in young and old stromal cell populations measured by RNA sequencing. The values represent the mean  $\pm$  s.d. of 3 biological replicates/population.

**h)** Expression of the gene encoding Epo in young and old stromal cell populations measured by RNA sequencing. The values represent the mean  $\pm$  s.d. of 3 biological replicates/population.

**i)** Quantification by ELISA of IL-6 protein in young mice injected with empty pCMV-entry vector (Control, N=3) or pCMV6-Entry vector containing IL-6 cDNA (IL-6, N=3). Data are from 2 independent experiments. Values show mean  $\pm$  s.e.m. . \*\* P<0.01 (two-tailed unpaired Student's t-test). Exact P value: 0.0069.

**j)** Quantification of myelo-erythroid progenitors from young mice hydrodynamically injected with empty pCMV-entry vector (Control, N=6) or pCMV6-Entry vector expressing *Il6* cDNA (*Il6*, N=5). Data are from 2 independent experiments. Values are mean  $\pm$  s.d. \* P<0.05; \*\*\*P<0.001 (two-tailed unpaired Student's t-test). Exact P values: MkP: 0.50; preGM: 0.67; GMP: 0.002; preMegE: 0.01; preCFU-E: 0.72; CFU-E: 0.19.

Source data are provided as a source data file.

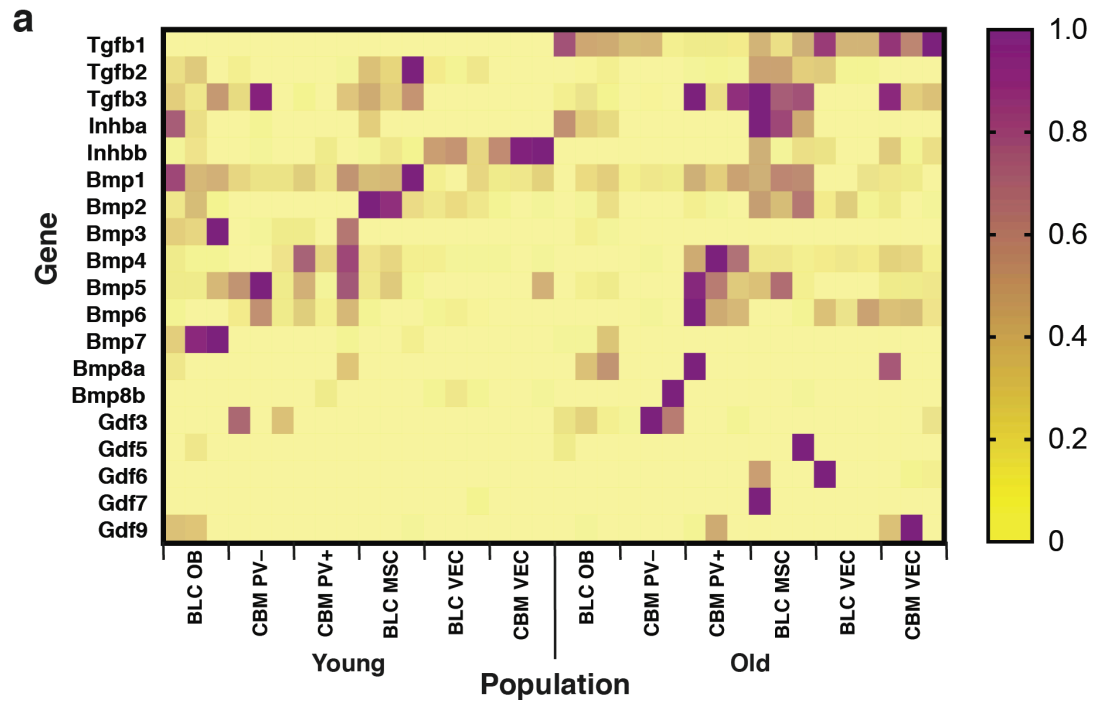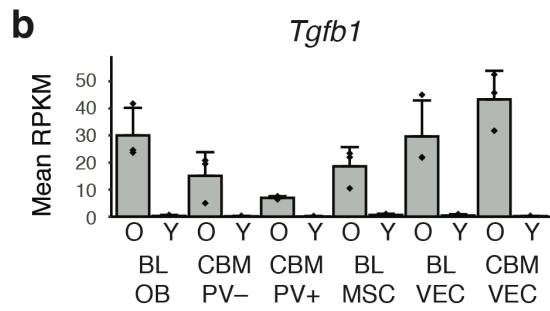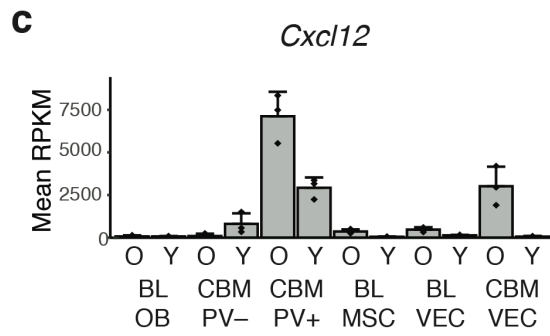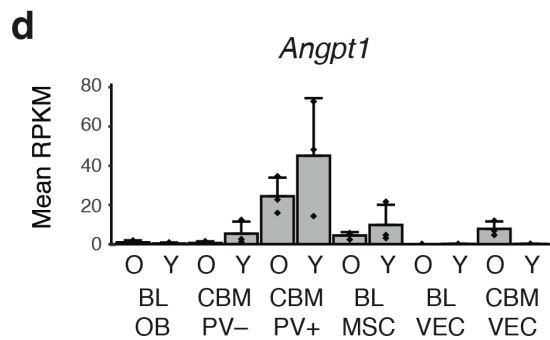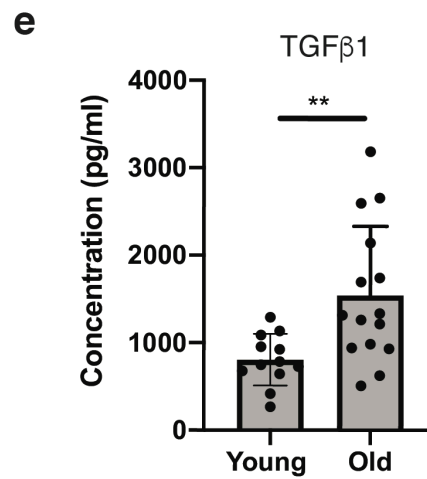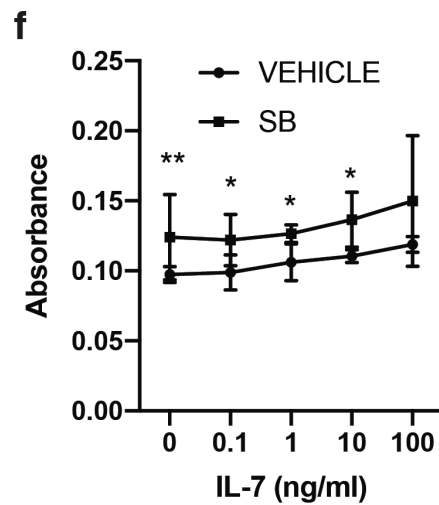

Supplementary Figure 4

#### **Supplementary Figure 4. TGF $\beta$ signaling in aged bone marrow.**

**c)** Heatmap of the expression of genes encoding the indicated TGF $\beta$ /activin/GDF family ligand genes in young and old sorted bone marrow stromal cell populations. Data were normalized and scaled for each gene individually.

**b-d)** Expression of the genes encoding TGF $\beta$ 1 (b), Cxcl12 (c) and Angiopoietin-1 (d) in young and old stromal cell populations measured by RNA sequencing. The values represent the mean  $\pm$  s.d. of 3 biological replicates/population.

**e)** Quantification by ELISA of TGF $\beta$ 1 protein in bone marrow supernatant obtained from young (N=12) and old mice (N=15). Data are from 2 independent experiments. Values show mean  $\pm$  s.e.m. \*\* P<0.01 (two-tailed unpaired Student's t-test). Exact P value: 0.005.

**f)** Proliferation of early B precursor cells determined by MTS assay. The absorbance at 490nm was recorded after 48 hours. Cells were isolated from vehicle (VEHICLE, N=5) and SB-treated (SB, N=7) old mice (3 independent experiments) cultured with different concentrations of mIL-7 (0.1, 1, 10, and 100ng/ml, as indicated). Values show mean  $\pm$  s.e.m. \* P<0.05; \*\* P<0.01 (two-tailed unpaired Student's t-test, no correction for multiple testing). Exact P values: 0ng/ml: 0.0051; 0.1ng/ml: 0.0341; 1ng/ml: 0.0101; 10ng/ml: 0.0480; 100ng/ml: 0.3290.

Source data are provided as a source data file.
